# Supplementary material for: A complex of cadherin 17 with desmocollin 1 and p120-catenin regulates colorectal cancer migration and invasion according to the cell phenotype
Source: PubMed Central journal article supplement (PMC10807196; doi:10.1186/s13046-024-02956-6), 2024-01-24
Supplement: 13046_2024_2956_MOESM3_ESM.pdf [file 13046_2024_2956_MOESM3_ESM.pdf]

**Table S1: List of CDH17 immunoprecipitated proteins in HT-29 and RKO cell lines.**

| Identified proteins in HT-29 cell line |          |                                                 | Control IP |            |       | CDH17 IP |            |       |
|----------------------------------------|----------|-------------------------------------------------|------------|------------|-------|----------|------------|-------|
| Accession                              | Name     | Description                                     | Score      | # Peptides | # PSM | Score    | # Peptides | # PSM |
| Q9BQE3                                 | TUBA1C   | Tubulin alpha-1C chain                          | 126,89     | 4          | 4     | 728,73   | 10         | 23    |
| P14923                                 | JUP      | Junction plakoglobin                            | 44,52      | 1          | 1     | 513,25   | 13         | 16    |
| Q08554                                 | DSC1     | Desmocollin-1                                   | 35,68      | 1          | 1     | 108,28   | 3          | 4     |
| P07437                                 | TUBB5    | Tubulin beta chain 5                            | 146,11     | 3          | 3     | 760,88   | 9          | 23    |
| P68366                                 | TUBA4A   | Tubulin alpha-4A chain                          | 126,89     | 4          | 4     | 477,24   | 8          | 18    |
| P68371                                 | TUBB2C   | Tubulin beta-2C chain                           | 125,88     | 3          | 3     | 651,02   | 8          | 19    |
| P28799                                 | GRN      | Granulins                                       | 38,68      | 1          | 1     | 239,18   | 7          | 12    |
| P35579                                 | MYH9     | Myosin-9                                        |            |            |       | 591,42   | 17         | 19    |
| P00352                                 | ALDH1A1  | Retinal dehydrogenase 1                         |            |            |       | 390,84   | 11         | 11    |
| P12814                                 | ACTN1    | Alpha-actinin-1                                 |            |            |       | 337,92   | 10         | 10    |
| P29508                                 | SERPINB3 | Serpin B3                                       |            |            |       | 30,87    | 1          | 1     |
| P04040                                 | CAT      | Catalase                                        |            |            |       | 149,88   | 4          | 4     |
| P02452                                 | COL1A1   | Collagen alpha-1(I) chain                       |            |            |       | 166,31   | 5          | 6     |
| P08123                                 | COL1A2   | Collagen alpha-2(I) chain                       |            |            |       | 99,35    | 3          | 3     |
| P31151                                 | S100A7   | Protein S100-A7                                 |            |            |       | 99,02    | 2          | 3     |
| P15311                                 | EZR      | Ezrin                                           |            |            |       | 213,24   | 8          | 8     |
| P07737                                 | PFN1     | Profilin-1                                      | 48,38      | 1          | 1     | 167,08   | 3          | 4     |
| Q96AG4                                 | LRRC59   | Leucine-rich repeat-containing protein 59       |            |            |       | 85,91    | 3          | 3     |
| P05089                                 | ARG1     | Arginase-1                                      |            |            |       | 64,30    | 2          | 2     |
| Q13813                                 | SPTAN1   | Spectrin alpha chain, brain                     |            |            |       | 29,45    | 1          | 1     |
| O60701                                 | UGDH     | UDP-glucose 6-dehydrogenase                     |            |            |       | 119,34   | 5          | 5     |
| P30740                                 | SERPINB1 | Leukocyte elastase inhibitor                    |            |            |       | 176,49   | 5          | 5     |
| Q00535                                 | CDK5     | Cell division protein kinase 5                  |            |            |       | 39,61    | 2          | 2     |
| O60610                                 | DIAPH1   | Protein diaphanous homolog 1                    |            |            |       | 40,19    | 1          | 2     |
| O75369                                 | FLNB     | Filamin-B                                       |            |            |       | 318,71   | 11         | 11    |
| P46940                                 | IQGAP1   | Ras GTPase-activating-like protein IQGAP1       |            |            |       | 106,34   | 5          | 5     |
| O75874                                 | IDH1     | Isocitrate dehydrogenase [NADP <sup>+</sup> ] 1 |            |            |       | 85,13    | 3          | 3     |
| P36873                                 | PPP1CC   | Protein phosphatase PP1-gamma catalytic subunit |            |            |       | 132,39   | 2          | 3     |
| Q9Y490                                 | TLN1     | Talin-1                                         |            |            |       | 80,34    | 2          | 2     |
| Q16181                                 | SEPT7    | Septin-7                                        |            |            |       | 73,23    | 2          | 2     |
| P07384                                 | CAPN1    | Calpain-1 catalytic subunit                     |            |            |       | 71,85    | 2          | 2     |
| Q12864                                 | CDH17    | Cadherin-17                                     |            |            |       | 60,72    | 2          | 2     |
| P53041                                 | PPP5C    | Protein phosphatase 5 catalytic subunit         |            |            |       | 59,59    | 2          | 2     |
| Q9P258                                 | RCC2     | Protein RCC2                                    |            |            |       | 55,03    | 2          | 2     |
| Q9NVA2                                 | SEPT11   | Septin-11                                       |            |            |       | 51,33    | 2          | 2     |
| O15144                                 | ARPC2    | Actin-related protein 2/3 complex subunit 2     |            |            |       | 50,91    | 2          | 2     |
| P17931                                 | LGALS3   | Galectin-3                                      |            |            |       | 46,55    | 2          | 2     |
| P30085                                 | CMPK1    | UMP-CMP kinase                                  |            |            |       | 44,13    | 2          | 2     |
| P20742                                 | PZP      | Pregnancy zone protein                          |            |            |       | 41,74    | 2          | 2     |
| P60953                                 | CDC42    | Cell division control protein 42 homolog        |            |            |       | 43,68    | 1          | 2     |

| Identified proteins in RKO cell line |          |                                           | Control IP |            |       | CDH17 IP |            |       |
|--------------------------------------|----------|-------------------------------------------|------------|------------|-------|----------|------------|-------|
| Accession                            | Name     | Description                               | Score      | # Peptides | # PSM | Score    | # Peptides | # PSM |
| P14923                               | JUP      | Junction plakoglobin                      | 64,35      | 2          | 3     | 184,26   | 4          | 6     |
| P29508                               | SERPINB3 | Serpin B3                                 | 28,49      | 1          | 1     | 94,49    | 3          | 4     |
| Q08554                               | DSC1     | Desmocollin-1                             | 67,49      | 1          | 1     | 131,75   | 3          | 4     |
| Q27J81                               | INF2     | Inverted formin-2                         |            |            |       | 252,85   | 6          | 7     |
| P12273                               | PIP      | Prolactin-inducible protein               | 62,60      | 2          | 2     | 30,79    | 1          | 1     |
| P05089                               | ARG1     | Arginase-1                                |            |            |       | 61,62    | 2          | 2     |
| P04040                               | CAT      | Catalase                                  |            |            |       | 111,93   | 4          | 4     |
| Q96AG4                               | LRRC59   | Leucine-rich repeat-containing protein 59 | 37,54      | 1          | 1     | 62,04    | 3          | 3     |
| Q9Y315                               | DERA     | Deoxyribose-phosphate aldolase            | 57,98      | 1          | 1     | 46,44    | 1          | 1     |
| O00139                               | KIF2A    | Kinesin-like protein KIF2A                |            |            |       | 66,08    | 2          | 2     |
| P04196                               | HRG      | Histidine-rich glycoprotein               |            |            |       | 74,00    | 1          | 2     |
| Q9BW19                               | KIFC1    | Kinesin-like protein KIFC1                |            |            |       | 70,01    | 2          | 2     |
| Q12864                               | CDH17    | Cadherin-17                               |            |            |       | 55,16    | 2          | 2     |
| P09382                               | LGALS1   | Galectin-1                                |            |            |       | 23,20    | 1          | 1     |
| P63172                               | DYNLT1   | Dynein light chain Tctex-type 1           |            |            |       | 30,46    | 1          | 1     |

**Table S2: CDH17 co-immunoprecipitated proteins in different colon cancer cell lines.**

| Proteins identified in KM12SM cells |                                                  |           | RKO       | HT-29     |
|-------------------------------------|--------------------------------------------------|-----------|-----------|-----------|
| Accession                           | Protein name                                     | Gene name | Gene name | Gene name |
| Q12864                              | Cadherin-17                                      | CDH17     | CDH17     | CDH17     |
| P14923                              | Junction plakoglobin                             | JUP       | JUP       | JUP       |
| P35221                              | Catenin alpha-1                                  | CTNNA1    |           |           |
| P16422                              | Epithelial cell adhesion molecule                | EPCAM     |           | EPCAM     |
| O43813                              | LanC-like protein 1                              | LANCL1    |           |           |
| P23528                              | Cofilin-1                                        | CFL1      |           | CFL1      |
| P16070                              | CD44 antigen                                     | CD44      |           |           |
| Q8WX93                              | Isoform 4 of Palladin                            | PALLD     |           |           |
| P52565                              | Rho GDP-dissociation inhibitor 1                 | ARHGDI1   |           |           |
| Q12792                              | Twinfilin-1                                      | TWF1      |           |           |
| P17931                              | Galectin-3                                       | LGALS3    | LGALS1    | LGALS3    |
| P37802                              | Transgelin-2                                     | TAGLN2    |           | TAGLN2    |
| Q9NRL3                              | Striatin-4                                       | STRN4     |           | STRN4     |
| Q86W34                              | Archaemetzincin-2                                | AMZ2      |           |           |
| O75369                              | Filamin-B                                        | FLNB      |           | FLNB      |
| Q13813                              | Spectrin alpha chain, brain                      | SPTAN1    |           | SPTAN1    |
| P68371                              | Tubulin beta-4B chain                            | TUBB4B    |           | TUBB2C    |
| Q9BQE3                              | Tubulin alpha-1C chain                           | TUBA1C    |           | TUBA1C    |
| Q9Y490                              | Talin-1                                          | TLN1      |           | TLN1      |
| P12814                              | Alpha-actinin-1                                  | ACTN1     | ACTN1     | ACTN1     |
| P68366                              | Tubulin alpha-4A chain                           | TUBA4A    |           | TUBA4A    |
| P16144                              | Integrin beta-4                                  | ITGB4     |           |           |
| Q9BUF5                              | Tubulin beta-6 chain                             | TUBB6     |           | TUBB5     |
| P33176                              | Kinesin-like protein KIF5A                       | KIF5B     | KIF2A     | KIF5B     |
| Q14204                              | Cytoplasmic dynein 1 heavy chain 1               | DYNC1H1   | DYNLT1    | DYNC1H1   |
| O60610                              | Protein diaphanous homolog 1                     | DIAPH1    |           | DIAPH1    |
| P15311                              | Ezrin                                            | EZR       |           | EZR       |
| Q13576                              | Ras GTPase-activating-like protein IQGAP2        | IQGAP2    |           | IQGAP1    |
| Q7Z406                              | Myosin-14                                        | MYH14     |           | MYH9      |
| P18206                              | Vinculin                                         | VCL       |           |           |
| P27816                              | Microtubule-associated protein 4                 | MAP4      |           |           |
| P29966                              | Myristoylated alanine-rich C-kinase substrate    | MARCKS    |           |           |
| P52732                              | Kinesin-like protein KIF11                       | KIF11     | KIFC1     |           |
| Q9HC35                              | Echinoderm microtubule-associated protein-like 4 | EML4      |           |           |
| P35442                              | Thrombospondin-2                                 | THBS2     |           |           |
| P06493                              | Cyclin-dependent kinase 1                        | CDK1      |           | CDK5      |
| Q15019                              | Septin-2                                         | SEPT2     |           | SEPT2     |
| O60716                              | Catenin delta-1                                  | CTNND1    |           | CTNND1    |
| P62136                              | Protein phosphatase PP1-alpha catalytic subunit  | PPP1CA    |           | PPP1CC    |
| P30622                              | CAP-Gly domain-containing linker protein 1       | CLIP1     |           |           |
| P05556                              | Integrin beta-1                                  | ITGB1     |           |           |
| Q12965                              | Unconventional myosin-Ie                         | MYO1E     |           |           |
| Q13045                              | Protein flightless-1 homolog                     | FLII      |           |           |
| P60953                              | Cell division control protein 42 homolog         | CDC42     |           | CDC42     |
| Q9Y295                              | Developmentally-regulated GTP-binding protein 1  | DRG1      |           |           |
| P61160                              | Actin-related protein 2                          | ACTR2     |           |           |

| Proteins identified in KM12SM cells |                                                     |           | RKO       | HT-29     |
|-------------------------------------|-----------------------------------------------------|-----------|-----------|-----------|
| Accession                           | Protein name                                        | Gene name | Gene name | Gene name |
| Q16181                              | Septin-7                                            | SEPT7     | SEPT7     | SEPT7     |
| Q7L576                              | Cytoplasmic FMR1-interacting protein 1              | CYFIP1    |           |           |
| P07737                              | Profilin-1                                          | PFN1      | PFN1      | PFN1      |
| P49006                              | MARCKS-related protein                              | MARCKSL1  |           |           |
| O14974                              | Protein phosphatase 1 regulatory subunit 12A        | PPP1R12A  |           |           |
| P35222                              | Catenin beta-1                                      | CTNNB1    |           |           |
| P23229                              | Integrin alpha-6                                    | ITGA6     |           |           |
| Q9UHD8                              | Isoform 7 of Septin-9                               | SEPT9     |           | SEPT9     |
| P47756                              | F-actin-capping protein subunit beta                | CAPZB     |           | CAPZB     |
| Q9Y2A7                              | Nck-associated protein 1                            | NCKAP1    |           |           |
| P20936                              | Ras GTPase-activating protein 1                     | RASA1     |           |           |
| O15144                              | Actin-related protein 2/3 complex subunit 2         | ARPC2     |           | ARPC2     |
| Q27J81                              | Inverted formin-2                                   | INF2      | INF2      | INF2      |
| P18827                              | Syndecan-1                                          | SDC1      |           |           |
| P17655                              | Calpain-2 catalytic subunit                         | CAPN2     |           | CAPN1     |
| Q9NVA2                              | Septin-11                                           | SEPT11    |           | SEPT11    |
| Q01970                              | Phosphoinositide phospholipase C beta3              | PLCB3     |           |           |
| P50570                              | Dynamamin-2                                         | DNM2      |           |           |
| Q9P258                              | Protein RCC2                                        | RCC2      |           | RCC2      |
| Q92974                              | Rho guanine nucleotide exchange factor 2            | ARHGEF2   |           | ARHGEF2   |
| Q07866                              | Kinesin light chain 1                               | KLC1      |           |           |
| Q09666                              | Neuroblast differentiation-associated protein AHNAK | AHNAK     |           |           |
| Q9P035                              | 3-hydroxyacyl-CoA dehydratase 3                     | PTPLAD1   |           |           |
| O75116                              | Rho-associated protein kinase 2                     | ROCK2     |           |           |
| Q5H9R7                              | protein phosphatase 6 regulatory subunit 3          | PPP6R3    |           |           |
| P30740                              | Leukocyte elastase inhibitor                        | SERPINB1  | SERPINB3  | SERPINB1  |
| Q9BQL6                              | Fermitin family homolog 1                           | FERMT1    |           |           |
| O94804                              | Serine/threonine-protein kinase 10                  | STK10     |           |           |
| Q9H3S7                              | Tyrosine-protein phosphatase non-receptor type 23   | PTPN23    |           |           |
| Q86TR8                              | Serine/threonine-protein kinase MRCK beta           | CDC42BPB  |           |           |
| Q9Y3S1                              | Serine/threonine-protein kinase WNK2                | WNK2      |           |           |
| O00743                              | protein phosphatase 6 catalytic subunit             | PPP6C     |           |           |
| Q5VZK9                              | Leucine-rich repeat-containing protein 16A          | LRRC16A   | LRRC59    | LRRC59    |

|  |                                              |
|--|----------------------------------------------|
|  | Same protein (statistically significant)     |
|  | Same protein (non-statistically significant) |
|  | Protein from the same family                 |
